# Supplementary material
Source: Springer Nature journal article supplement (https://www.springermedizin.de/resource/supplementary/12889_2014_6931_MOESM3_ESM.pdf/9499340)
Supplement: MOESM3 [file 9499340]

### Additional file 3: Studies included in the analysis (N = 31) by age groups with prevalence estimates.

| Study nr. | Name (Year)              | Country         | Study Population | Data source/study                                | Nr. of patients | Nr. of age groups | Age group | Prevalence P2+ | Prevalence P3+ |
|-----------|--------------------------|-----------------|------------------|--------------------------------------------------|-----------------|-------------------|-----------|----------------|----------------|
| 1         | Newacheck et al 1991     | United States   |                  | National health interview survey on child health | 7465            | 1                 | 10-17     | 10.2           | 3.2            |
| 2         | Schellevis et al 1993    | The Netherlands |                  | database of 7 GP practices                       | 23534           | 2                 | <65       | 0.3            | 0              |
|           |                          |                 |                  |                                                  |                 |                   | ≥65       | 3.5            | 0.3            |
| 3         | Menotti et al 2001       | Finland         |                  | Different cohorts of FINE Study                  | 716             | 1                 | 65-84     | 23.3           | 7.5            |
|           |                          | The Netherlands |                  |                                                  | 887             | 1                 | 65-84     | 13.1           | 2.8            |
|           |                          | Italy           |                  |                                                  | 682             | 1                 | 65-84     | 15.3           | 2.5            |
| 4         | Wolff et al 2002         | United States   |                  | Medicare, Part A and B                           | 1'217'103       | 5                 | 65-69     | 53.9           | 31.7           |
|           |                          |                 |                  |                                                  |                 |                   | 70-74     | 63.1           | 40.6           |
|           |                          |                 |                  |                                                  |                 |                   | 75-79     | 68.8           | 47.2           |
|           |                          |                 |                  |                                                  |                 |                   | 80-84     | 72.5           | 51.6           |
|           |                          |                 |                  |                                                  |                 |                   | ≥85       | 72.8           | 51.8           |
| 5         | Chan et al 2002          | Australia       |                  | Survey of hospital admissions, Randwick Area     | 526             | 1                 | 55-95     | 54.2           | 29.5           |
| 6         | Rapoport et al 2004      | Canada          |                  | National population health survey                | 13682           | 4                 | 20-39     | 11.5           | 3.5            |
|           |                          |                 |                  |                                                  |                 |                   | 40-59     | 26.3           | 11.9           |
|           |                          |                 |                  |                                                  |                 |                   | 60-79     | 54.7           | 30.7           |
|           |                          |                 |                  |                                                  |                 |                   | ≥80       | 64.0           | 41.7           |
| 7         | Macleod et al 2004       | United Kingdom  |                  | Cairns practice registry, Glasgow                | 7286            | 1                 | ≥18       | 30.4           | 15             |
| 8         | Alonso et al 2004        | United States   |                  | General social survey                            | 2'474           | 1                 | mean 43.6 | 41.8           | 23.6           |
|           |                          | Denmark         |                  | Danish health survey                             | 4'084           | 1                 | ≥16       | 15.5           | 5.3            |
|           |                          | France          |                  | Household survey                                 | 3'656           | 1                 | ≥15       | 27.1           | 11.3           |
|           |                          | Germany         |                  | Infratest national database                      | 2'914           | 1                 | ≥14       | 36.5           | 22.1           |
|           |                          | Italy           |                  | National sample from electoral lists             | 2'031           | 1                 | ≥18       | 42.2           | 24.1           |
|           |                          | The Netherlands |                  | National and Amsterdam registry                  | 4'059           | 1                 | ≥12       | 38.6           | 32             |
|           |                          | Norway          |                  | National registry                                | 2'323           | 1                 | 19-80     | 24.3           | 10.5           |
| 9         | Fortin et al 2005        | Canada          |                  | 21 GPs of Saguenay, Quebec                       | 980             | 3                 | 18-44     | 69.3           | 46.7           |
|           |                          |                 |                  |                                                  |                 |                   | 45-64     | 93.0           | 76.4           |
|           |                          |                 |                  |                                                  |                 |                   | ≥65       | 98.7           | 95.7           |
| 10        | Naughton et al 2006      | Ireland         |                  | National pharmacy claims database                | 316'928         | 1                 | ≥70       | 60.4           | 33.1           |
| 11        | Min et al 2007           | United States   |                  | ACOVE study                                      | 372             |                   | ≥65       | 61.8           | 37.9           |
| 12        | Britt et al 2008         | Australia       |                  | General practice substudy of BEACH program       | 9'111           | 5                 | <25       | 2.6            | 0.6            |
|           |                          |                 |                  |                                                  |                 |                   | 25-44     | 14.7           | 3.9            |
|           |                          |                 |                  |                                                  |                 |                   | 45-64     | 46.5           | 22.7           |
|           |                          |                 |                  |                                                  |                 |                   | 65-74     | 74.6           | 46.0           |
|           |                          |                 |                  |                                                  |                 |                   | ≥75       | 83.2           | 58.2           |
| 13        | Hudon 2008               | Canada          |                  | Quebec health survey                             | 16782           | 1                 | 18-69     | 31.8           | 18             |
| 14        | Uijen et al 2008         | The Netherlands |                  | CMR, GP registry in Nijmegen                     | 13584           | 3                 | 45-64     | 29             | 17             |
|           |                          |                 |                  |                                                  |                 |                   | 65-74     | 66             | 47             |
|           |                          |                 |                  |                                                  |                 |                   | >75       | 85             | 72             |
| 15        | Lee et al 2008           | United States   |                  | Veteran health care database                     | 741'847         | 1                 | 55-64     | 40.8           | 17.3           |
| 16        | Schram et al 2008        | The Netherlands |                  | Leiden 85-plus population-based Study            | 599             | 1                 | ≥85       | 65             | 35.6           |
|           |                          |                 |                  | Rotterdam population-based Study                 | 3'550           | 1                 | 65-99     | 71.8           | 46.3           |
|           |                          |                 |                  | LASA population-based Study                      | 2'463           | 1                 | ≥55       | 56             | 32.3           |
|           |                          |                 |                  | CMR, GP registry in Nijmegen                     | 2'895           | 1                 | ≥55       | 66.3           | 48             |
|           |                          |                 |                  | RNUGP, GP registry Leiden region                 | 5'610           | 1                 | ≥55       | 56.1           | 37             |
| 17        | Wang et al 2008          | Germany         |                  | Health survey (20 GPs)                           | 1'009           | 1                 | 15-89     | 20.3           | 4.9            |
| 18        | Murtaugh et al 2009      | United States   |                  | OASIS data set (MediCare, MediCaid)              | 5'585'931       | 1                 | ≥65       | 42.1           | 17.1           |
| 19        | Schneider et al 2009     | United States   |                  | CCW data (MediCare)                              | 1'649'574       | 1                 | ≥0        | 20.3           | 7.6            |
| 20        | Loza et al 2009          | Spain           |                  | EPISER Health survey                             | 2'192           | 1                 | ≥20       | 30             | 14             |
| 21        | Minas et al 2010         | Central Greece  |                  | Data from various primary health care centers    | 20'299          | 2                 | <65       | 12.4           | 2.5            |
|           |                          |                 |                  |                                                  |                 |                   | ≥65       | 30.4           | 8.0            |
| 22        | Taylor et al 2010        | South Australia |                  | North West Adelaide health study                 | 3'203           | 3                 | 20-39     | 4.4            | 0.2            |
|           |                          |                 |                  |                                                  |                 |                   | 40-59     | 15.0           | 4.1            |
|           |                          |                 |                  |                                                  |                 |                   | 60-90     | 39.2           | 14.5           |
| 23        | Gunn et al 2010          | Australia       |                  | Diamond longitudinal study (various GPs)         | 6'864           | 3                 | 18-44     | 16.2           | 4.8            |
|           |                          |                 |                  |                                                  |                 |                   | 45-64     | 36.5           | 17.6           |
|           |                          |                 |                  |                                                  |                 |                   | ≥65       | 49.1           | 28.0           |
| 24        | Jansa et al 2010         | Spain           |                  | Survey of hospital discharges, Barcelona         | 301             | 1                 | 23-93     | 75.4           | 52.8           |
| 25        | Hung et al 2011          | United States   |                  | Health and retirement study 2008                 | 11'321          | 5                 | 65-69     | 63.4           | 33.1           |
|           |                          |                 |                  |                                                  |                 |                   | 70-74     | 70.8           | 40.0           |
|           |                          |                 |                  |                                                  |                 |                   | 75-79     | 75.0           | 46.5           |
|           |                          |                 |                  |                                                  |                 |                   | 80-84     | 78.5           | 47.9           |
|           |                          |                 |                  |                                                  |                 |                   | ≥85       | 77.8           | 50.4           |
| 26        | Aarts et al 2011         | The Netherlands |                  | Postal survey, Limburg                           | 15'188          | 1                 | 55-90     | 50.9           | 34.4           |
| 27        | Wong et al 2011          | The Netherlands |                  | Dutch hospital register                          | 1'414'142       | 1                 | ≥0        | 43.4           | 19.8           |
| 28        | v.d. Bussche et al 2011  | Germany         |                  | GEK claims database                              | 123'224         | 1                 | ≥65       | 73             | 62.1           |
| 29        | Galenkamp et al 2011     | The Netherlands |                  | LASA population-based study                      | 2'046           | 1                 | 57-98     | 42.8           | 18.9           |
| 30        | Tucker-Seeley et al 2011 | United States   |                  | Health and retirement study 2004                 | 7'305           | 3                 | 50-59     | 20.7           | 6.5            |
|           |                          |                 |                  |                                                  |                 |                   | 60-69     | 36.8           | 14.8           |
|           |                          |                 |                  |                                                  |                 |                   | ≥70       | 47.6           | 19.3           |
| 31        | Naessens et al 2011      | United States   |                  | Various administrative data                      | 33'324          | 3                 | 18-34     | 34.8           | 19.5           |
|           |                          |                 |                  |                                                  |                 |                   | 35-49     | 51.6           | 33.0           |
|           |                          |                 |                  |                                                  |                 |                   | 50-64     | 78.8           | 63.2           |

### Additional file 3 - References (as supplied by the authors)

1. Newacheck PW, McManus MA, HB. F: **Prevalence and impact of chronic illness among adolescents.** *Am J Dis Child* 1991, **145**(12):1367-1373.
2. Schellevis FG, van der Velden J, van de Lisdonk E, van Eijk JT, C. vW: **Comorbidity of chronic diseases in general practice.** *J Clin Epidemiol* 1993, **46**(5):469-473.
3. Menotti A, Mulder I, Nissinen A, Giampaoli S, Feskens EJM, Kromhout D: **Prevalence of morbidity and multimorbidity in elderly male populations and their impact on 10-year all-cause mortality: The FINE study (Finland, Italy, Netherlands, elderly).** *Journal of Clinical Epidemiology* 2001, **54**(7):680-686.
4. Wolff JL, Starfield B, Anderson G: **Prevalence, expenditures, and complications of multiple chronic conditions in the elderly.** *Arch Intern Med* 2002, **162**(20):2269-2276.
5. Chan DK, Chong R, Basilikas J, Mathie M, Hung WT: **Survey of major chronic illnesses and hospital admissions via the emergency department in a randomized older population in Randwick, Australia.** *Emerg Med (Fremantle)* 2002, **14**(4):387-392.
6. Rapoport J, Jacobs P, Bell NR, Klarenbach S: **Refining the measurement of the economic burden of chronic diseases in Canada.** *Chronic Dis Can* 2004, **25**(1):13-21.
7. Macleod U, Mitchell E, Black M, G. S: **Comorbidity and socioeconomic deprivation: an observational study of the prevalence of comorbidity in general practice.** *Eur J Gen Pract* 2004, **10**(1):24-26.
8. Alonso J, Ferrer M, Gandek B, Ware JE, Jr., Aaronson NK, Mosconi P, Rasmussen NK, Bullinger M, Fukuhara S, Kaasa S *et al*: **Health-related quality of life associated with chronic conditions in eight countries: results from the International Quality of Life Assessment (IQOLA) Project.** *Qual Life Res* 2004, **13**(2):283-298.
9. Fortin M, Bravo G, Hudon C, Vanasse A, Lapointe L: **Prevalence of multimorbidity among adults seen in family practice.** *The Annals of Family Medicine* 2005, **3**(3):223-228.
10. Naughton C, Bennett K, J. F: **Prevalence of chronic disease in the elderly based on a national pharmacy claims database.** *Age Ageing* 2006, **35**(6):633-636.
11. Min LC, Wenger NS, Fung C, Chang JT, Ganz DA, Higashi T, Kamberg CJ, MacLean CH, Roth CP, Solomon DH *et al*: **Multimorbidity is associated with better quality of care among vulnerable elders.** *Medical Care* 2007, **45**(6):480-488.
12. Britt HC, Harrison CM, Miller GC, Knox SA: **Prevalence and patterns of multimorbidity in Australia.** *Med J Aust* 2008, **189**(2):72-77.
13. Hudon C, Soubhi H, Fortin M: **Relationship between multimorbidity and physical activity: secondary analysis from the Quebec health survey.** *BMC Public Health* 2008, **8**:304.
14. Uijen AA, van de Lisdonk EH: **Multimorbidity in primary care: prevalence and trend over the last 20 years.** *Eur J Gen Pract* 2008, **14 Suppl 1**:28-32.
15. Lee TA, Shields AE, Vogeli C, Gibson TB, Woong-Sohn M, Marder WD, Blumenthal D, Weiss KB: **Mortality rate in veterans with multiple chronic conditions.** *J Gen Intern Med* 2007, **22 Suppl 3**:403-407.
16. Schram MT, Frijters D, van de Lisdonk EH, Ploemacher J, de Craen AJ, de Waal MW, van Rooij FJ, Heeringa J, Hofman A, Deeg DJ *et al*: **Setting and registry characteristics affect the prevalence and nature of multimorbidity in the elderly.** *J Clin Epidemiol* 2008, **61**(11):1104-1112.

17. Wang H-M, Beyer M, Gensichen J, Gerlach FM: **Health-related quality of life among general practice patients with differing chronic diseases in Germany: Cross sectional survey.** *BMC Public Health* 2008, **8**(1):246.
18. Murtaugh C, Peng T, Totten A, Costello B, Moore S, H. A: **Complexity in geriatric home healthcare.** *J Healthc Qual* 2009, **31**(2):34-43.
19. Schneider KM, O'Donnell BE, Dean D: **Prevalence of multiple chronic conditions in the united states' medicare population.** *Health Qual Life Outcomes* 2009, **7**:82.
20. Loza E, Jover JA, Rodriguez L, Carmona L: **Multimorbidity: prevalence, effect on quality of life and daily functioning, and variation of this effect when one condition is a rheumatic disease.** *Seminars in arthritis and rheumatism* 2009, **38**(4):312-319.
21. Minas M, Koukousias N, Zintzaras E, Kostikas K, Gourgoulisianis KI: **Prevalence of chronic diseases and morbidity in primary health care in central Greece: An epidemiological study.** *BMC Health Services Research* 2010, **10**(1):252.
22. Taylor AW, Price K, Gill TK, Adams R, Pilkington R, Carrangis N, Shi Z, Wilson D: **Multimorbidity - not just an older person's issue. Results from an Australian biomedical study.** *BMC Public Health* 2011, **10**(1):718.
23. Gunn JM, Ayton DR, Densley K, Pallant JF, Chondros P, Herrman HE, Dowrick CF: **The association between chronic illness, multimorbidity and depressive symptoms in an Australian primary care cohort.** *Soc Psychiatry Psychiatr Epidemiol* 2012.
24. Jansà M, Hernández C, Vidal M, Nuñez M, Bertran MJ, Sanz S, Castell C, Sanz G: **Multidimensional analysis of treatment adherence in patients with multiple chronic conditions. A cross-sectional study in a tertiary hospital.** *Patient Education and Counseling* 2010, **81**(2):161-168.
25. Hung WW, Ross JS, Boockvar KS, Siu AL: **Recent Trends in Chronic Disease, Impairment and Disability Among Older Adults in the United States.** *BMC Geriatrics* 2011, **11**(1):47.
26. Aarts S, van den Akker M, Hajema KJ, van Ingen AM, Metsemakers JFM, Verhey FRJ, van Boxtel MPJ: **Multimorbidity and its relation to subjective memory complaints in a large general population of older adults.** *International Psychogeriatrics* 2011, **23**(04):616-624.
27. Wong A, Boshuizen HC, Schellevis FG, Kommer GJ, Polder JJ: **Longitudinal administrative data can be used to examine multimorbidity, provided false discoveries are controlled for.** *Journal of Clinical Epidemiology* 2011, **64**(10):1109-1117.
28. Van den Bussche H, Koller D, Kolonko T, Hansen H, Wegscheider K, Glaeske G, von Leitner EC, Schafer I, Schon G: **Which chronic diseases and disease combinations are specific to multimorbidity in the elderly? Results of a claims data based cross-sectional study in germany.** *BMC Public Health* 2011, **11**(1):101.
29. Galenkamp H, Braam AW, Huisman M, Deeg DJH: **Somatic Multimorbidity and Self-rated Health in the Older Population.** *The Journals of Gerontology Series B: Psychological Sciences and Social Sciences* 2011, **66B**(3):380-386.
30. Tucker-Seeley RD, Li Y, Sorensen G, Subramanian SV: **Lifecourse socioeconomic circumstances and multimorbidity among older adults.** *BMC Public Health* 2011, **11**(1):313.
31. Naessens JM, Stroebe RJ, Finnie DM, Shah ND, Wagie AE, Litchy WJ, Killinger PJ, O'Byrne TJ, Wood DL, RE. N: **Effect of multiple chronic conditions among working-age adults.** *Am J Manag Care* 2011, **17**(2):118-122.
